# Supplementary material for: Impact of the COVID-19 Pandemic on the Incidence of Suicidal Behaviors: A Retrospective Analysis of Integrated Electronic Health Records in a Population of 7.5 Million
Source: MDPI journal article supplement (doi:10.3390/ijerph192114364), 2022-11-02
Supplement: s1 [file s1]

# **Impact of COVID-19 pandemic on the incidence of suicidal behaviors: a retrospective analysis of integrated electronic health records in a 7.5-million population**

Supplementary File S1

## **CONTENTS**

|                                                                                                                                                                                                                                  |    |
|----------------------------------------------------------------------------------------------------------------------------------------------------------------------------------------------------------------------------------|----|
| Supplementary methods .....                                                                                                                                                                                                      | 2  |
| Table S1. Mental health resource utilization in Catalonia before and during the pandemic. ....                                                                                                                                   | 2  |
| Table S2. Definition of the variables recorded at the Suicide Risk Code dataset used in the analysis.....                                                                                                                        | 3  |
| Table S3. Codes of the International Classification of Diseases (v10, clinical modification) considered for each mental health disorder .....                                                                                    | 6  |
| Supplementary figures .....                                                                                                                                                                                                      | 7  |
| Figure S1. Decomposition of additive time series. ....                                                                                                                                                                           | 7  |
| Figure S2. Monthly incidence, overall and according to gender; sub-analysis for individuals within the high (a), moderate (b), and low or very low (c) socioeconomic status. ....                                                | 8  |
| Figure S3. Type of drug abuse among individuals with suicidal behaviors. Percentages for the pre-pandemic period (i.e., January 01, 2017 to February 29, 2020) and pandemic period (i.e., March 01, 2020 to June 30, 2022). .... | 11 |
| Supplementary TABLES.....                                                                                                                                                                                                        | 12 |
| Table S4. Type of drug abuse of individuals with suicidal behaviors within the investigated period. Results are presented as no. and percentage of individuals..                                                                 | 12 |

## SUPPLEMENTARY METHODS

Table S1. Mental health resource utilization in Catalonia before and during the pandemic.

| Year | Outpatient contacts | Annual change outpatients | Hospital contacts | Annual change hospitals |
|------|---------------------|---------------------------|-------------------|-------------------------|
| 2018 | 1,601,576           | -                         | 25,828            | -                       |
| 2019 | 1,662,312           | 3.80%                     | 23,346            | -9.60%                  |
| 2020 | 1,807,636           | 8.70%                     | 23,573            | 1.00%                   |
| 2021 | 1,884,922           | 4.30%                     | 26,570            | 12.70%                  |

Source: Annual healthcare reports – Catalan Health Service. Available at: <https://catsalut.gencat.cat/ca/coneix-catsalut/presentacio/informes-memories-activitat/anual-catsalut/>

Table S2. Definition of the variables recorded at the Suicide Risk Code dataset used in the analysis

| Domain  | Variable Code          | Description                                                                                                                   |
|---------|------------------------|-------------------------------------------------------------------------------------------------------------------------------|
| Patient | patient_id             | Patient identifier                                                                                                            |
| Patient | birth_date             | Date of birth                                                                                                                 |
| Patient | gender                 | Gender                                                                                                                        |
| Patient | up_abs                 | Health area of the health centre associated with the patient                                                                  |
| Patient | up_csm                 | Mental health centre associated with the patient                                                                              |
| Patient | n_temptative           | Number of suicide attempts registered at the Suicide Risk Code                                                                |
| Patient | exitus                 | Exitus                                                                                                                        |
| Patient | exitus_suicide_related | Exitus related with any suicide attempt registered at the SRC                                                                 |
| Patient | exitus_date            | Date of exitus                                                                                                                |
| Patient | date                   | Date of inclusion of the patient in the SRC                                                                                   |
| Patient | extius_cause           | Cause of exitus (in case of being related with the SRC)                                                                       |
| Episode | patient_id             | Patient identifier                                                                                                            |
| Episode | episode_id             | Episode identifier                                                                                                            |
| Episode | num_temptativa         | Number of the suicide attempt associated with the episode                                                                     |
| Episode | date                   | Date of the episode                                                                                                           |
| Episode | centre                 | Health centre associated with the episode                                                                                     |
| Episode | c1_death_thoughts      | Answer to the first question of the MINI scale "Have you thought it would be better to die or have you wished you were dead?" |
| Episode | c1_points              | Points associated with the answer to the first question. Yes: 1 point; No: 0 points.                                          |
| Episode | c2_want_to_hurt        | Answer to the second question of the MINI scale "Did you want to hurt yourself?"                                              |
| Episode | c2_points              | Points associated with the answer to the second question. Yes: 2 points; No: 0 points.                                        |
| Episode | c3_suicide_thoughts    | Answer to the third question of the MINI scale "Have you thought about suicide?"                                              |

|         |                       |                                                                                                                                       |
|---------|-----------------------|---------------------------------------------------------------------------------------------------------------------------------------|
| Episode | c3_points             | Points associated with the answer to the third question. Yes: 6 points; No: 0 points.                                                 |
| Episode | c4_suicide_planning   | Answer to the fourth question of the MINI scale "Have you planned how to commit suicide?"                                             |
| Episode | c4_points             | Points associated with the answer to the fourth question. Yes: 10 points; No: 0 points.                                               |
| Episode | c5_suicide_attempt    | Answer to the fifth question of the MINI scale "Have you tried to commit suicide?"                                                    |
| Episode | c5_points             | Points associated with the answer to the fifth question. Yes: 10 points; No: 0 points.                                                |
| Episode | c6_previous_attempts  | Answer to the sixth question of the MINI scale "Have you ever tried to commit suicide?"                                               |
| Episode | c6_points             | Points associated with the answer to the sixth question. Yes: 10 points; No: 0 points.                                                |
| Episode | mini_points           | Sum of the points obtained from the responses to the MINI scale screening                                                             |
| Episode | mini_risk_group       | Risk group associated with the results from the MINI scale: Low (0 – 5 points), moderate (6 – 9 points), and high ( $\geq 10$ points) |
| Episode | mental_disorder       | The patient has a mental disorder present at the episode (Yes / No)                                                                   |
| Episode | live_alone            | The patient lives alone (Yes / No)                                                                                                    |
| Episode | hopelessness          | The patient has feelings of hopelessness (Yes / No)                                                                                   |
| Episode | agressiveness         | The patient shows impulsiveness, aggressiveness, or an altered level of consciousness (Yes / No)                                      |
| Episode | stressful_live_events | The patient has recently had any stressful life event such as unemployment, partner problems or family problems (Yes / No)            |
| Episode | social_problems       | The patient has recently had any social problems such as isolation, lack of support or socioeconomic problems (Yes / No)              |
| Episode | lack_family           | The patient has an absence of a family or social core (Yes / No)                                                                      |
| Episode | painful_disease       | The patient has a serious somatic or disabling illness with the presence of pain (Yes / No)                                           |
| Episode | access_lethal_means   | The patient has access to lethal means (Yes / No)                                                                                     |
| Episode | alcohol               | The patient is under the influence of the alcohol (Yes / No)                                                                          |

|         |                            |                                                                                        |
|---------|----------------------------|----------------------------------------------------------------------------------------|
| Episode | drugs                      | The patient is under the influence of any drug (Yes / No)                              |
| Episode | letality                   | Degree of lethality in case of attempt by clinical judgment (Mild / Moderate / Severe) |
| Episode | destination                | Destination of the patient after the episode (Discharge at home / Hospital admission)  |
| Episode | suicide_planning           | There is suicidal ideation planning (Yes / No)                                         |
| Episode | mental_disorder_code       | Type DGN Catalog of Mental Disorder                                                    |
| Episode | mental_disorder_diagnostic | Diagnosis of mental disorder present at the episode                                    |
| Episode | family_history_suicide     | The patient has a family history of suicide (Yes / No)                                 |

Table S3. Codes of the International Classification of Diseases (v10, clinical modification) considered for each mental health disorder

|             |                       |
|-------------|-----------------------|
| F1*         | Drugs                 |
| F10*        | Alcohol abuse         |
| F11*        | Opioids abuse         |
| F12*        | Cannabis abuse        |
| F13*        | Hypnotic drugs abuse  |
| F14*        | Cocaine abuse         |
| F17*        | Tobacco abuse         |
| F51*        | Sleep disorders       |
| F6*         | Personality disorders |
| F31*        | Bipolar disorders     |
| F33* - F39* | Depression            |
| F41*        | Anxiety               |
| F50*        | Eating disorders      |
| F20*, F25*  | Schizophrenia         |
| G30*        | Alzheimer             |

# SUPPLEMENTARY RESULTS

Figure S1. Decomposition of additive time series.

The observed rate was decomposed into a time series including the overall trend, the additive seasonal component, and random component using moving averages. The moving average considered a 12-month symmetric window with equal weights. The seasonal component was computed by averaging, for each time unit, over all periods. Finally, the error component is determined by removing trend and seasonal components from the original time series.

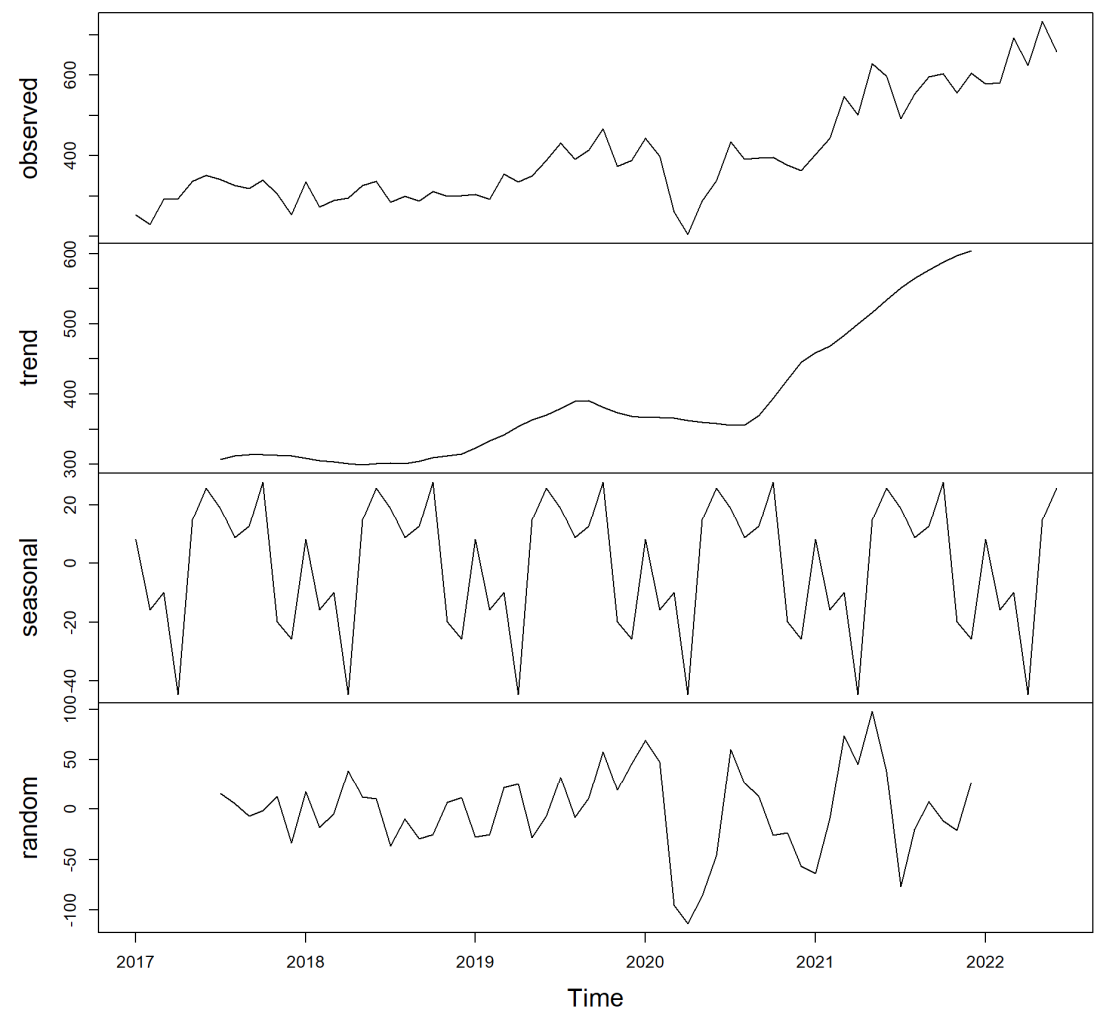

Figure S2. Monthly incidence, overall and according to gender; sub-analysis for individuals within the high (a), moderate (b), and low or very low (c) socioeconomic status.

a)

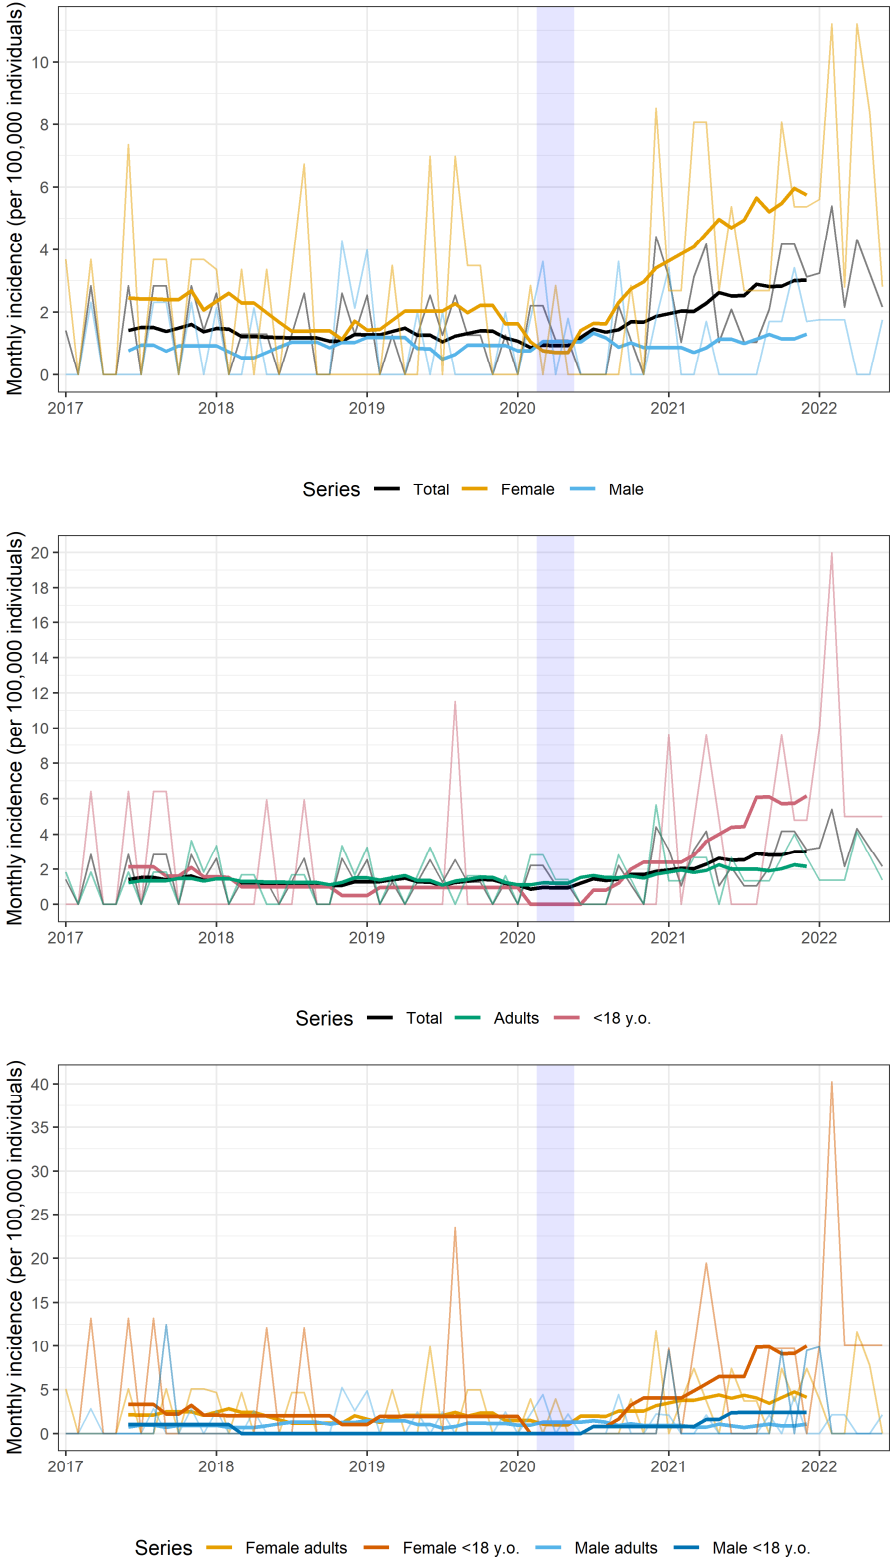



b)

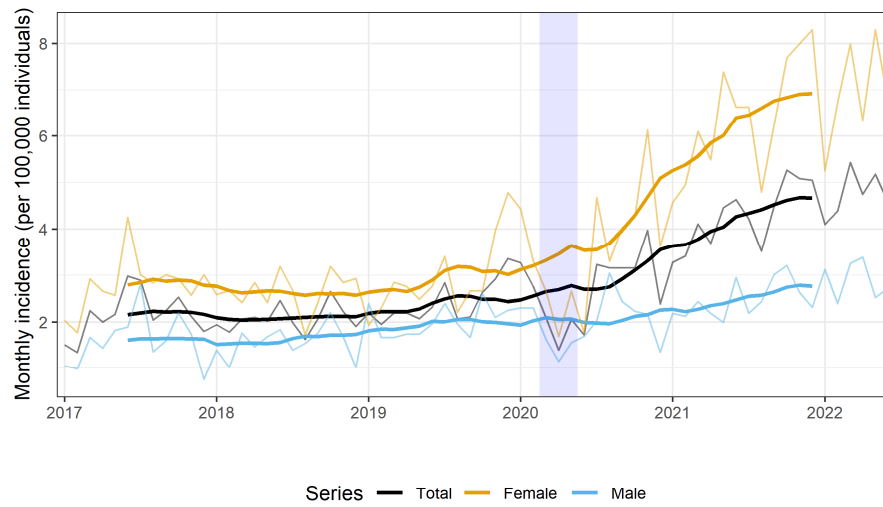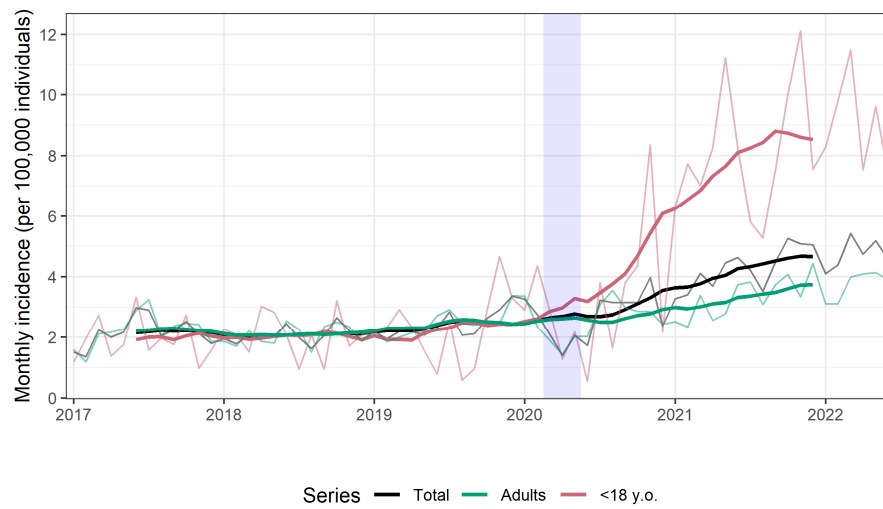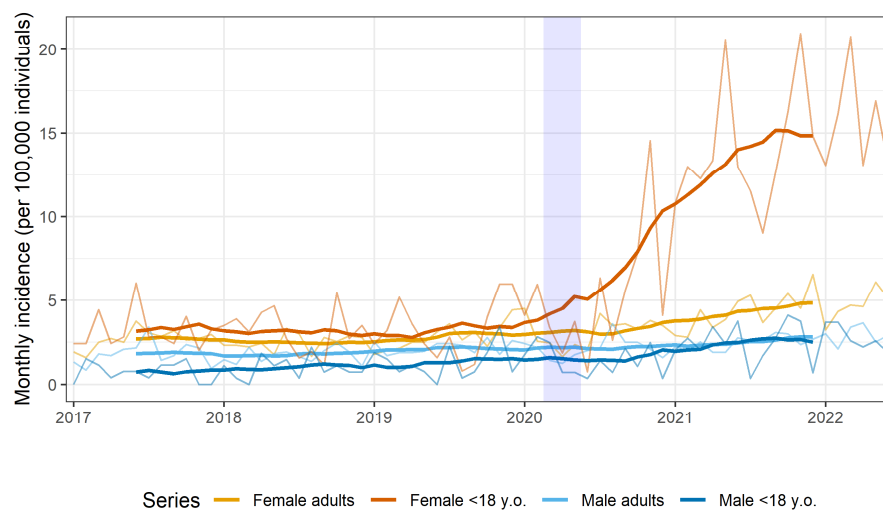

c)

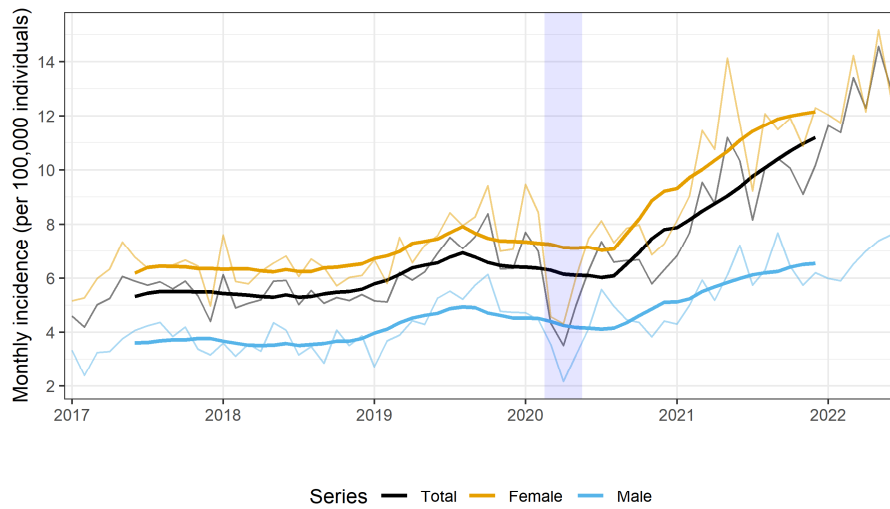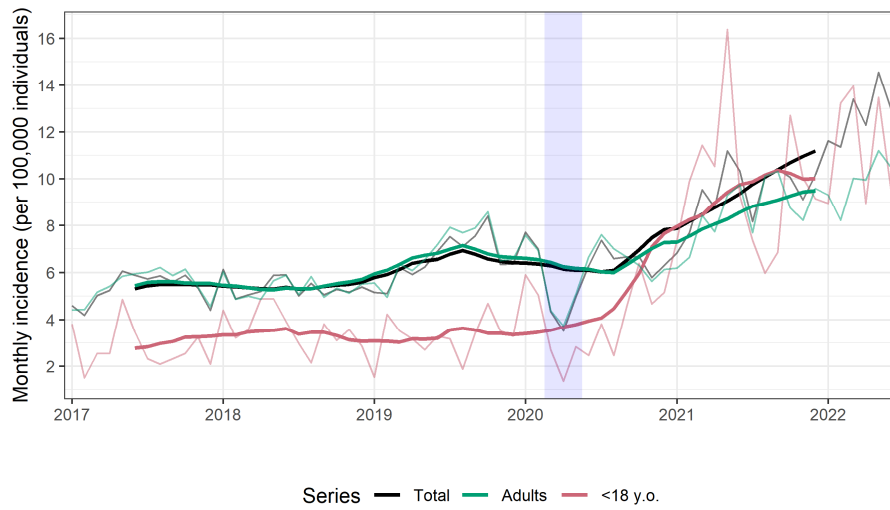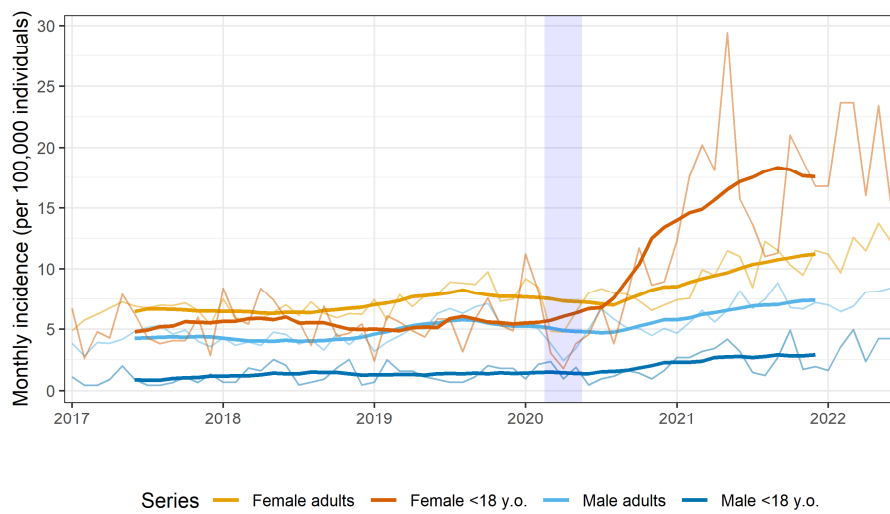

Figure S3. Type of drug abuse among individuals with suicidal behaviors. Percentages for the pre-pandemic period (i.e., January 01, 2017 to February 29, 2020) and pandemic period (i.e., March 01, 2020 to June 30, 2022).

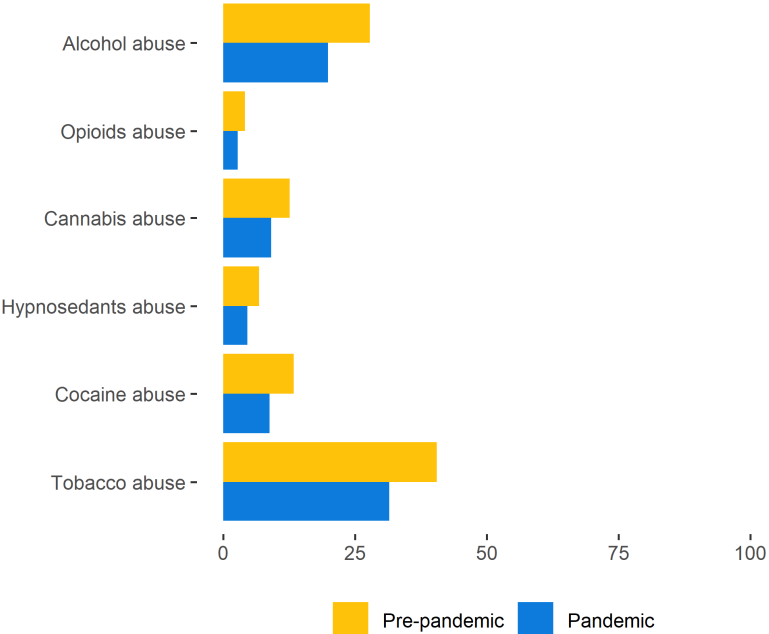

## SUPPLEMENTARY TABLES

Table S4. Type of drug abuse of individuals with suicidal behaviors within the investigated period. Results are presented as no. and percentage of individuals.

|                      | 2017<br>(N = 3641) | 2018<br>(N = 3638) | 2019<br>(N = 4489) | 2020<br>(N = 4291) | 2021<br>(N = 6528) | 2022 <sup>1</sup><br>(N = 3871) |
|----------------------|--------------------|--------------------|--------------------|--------------------|--------------------|---------------------------------|
| Alcohol abuse        | 874 (24%)          | 773 (21.25%)       | 1033 (23.01%)      | 1002 (23.35%)      | 1149 (17.6%)       | 594 (15.34%)                    |
| Opioids abuse        | 132 (3.63%)        | 122 (3.35%)        | 160 (3.56%)        | 152 (3.54%)        | 163 (2.5%)         | 70 (1.81%)                      |
| Cannabis abuse       | 370 (10.16%)       | 346 (9.51%)        | 454 (10.11%)       | 456 (10.63%)       | 548 (8.39%)        | 265 (6.85%)                     |
| Hypnotic drugs abuse | 180 (4.94%)        | 187 (5.14%)        | 258 (5.75%)        | 244 (5.69%)        | 275 (4.21%)        | 128 (3.31%)                     |
| Cocaine abuse        | 396 (10.88%)       | 393 (10.8%)        | 536 (11.94%)       | 430 (10.02%)       | 531 (8.13%)        | 272 (7.03%)                     |
| Tobacco abuse        | 1500 (41.2%)       | 1464 (40.24%)      | 1825 (40.65%)      | 1671 (38.94%)      | 1976 (30.27%)      | 1046 (27.02%)                   |

<sup>1</sup> The observation period for year 2022 ends on June 30, 2022.
